# Supplementary material
Source: PubMed Central journal article supplement (PMC5735047)
Supplement: JOA-232-105-s001.pdf [file JOA-232-105-s001.pdf]

**Table S1:** Pelvic musculature origins and insertions. This table shows the origin and insertion of major pelvic muscles dissected in the helmeted guineafowl (GF), mallard (MA), Canada goose (CG), mute swan (MS), double-crested cormorant (DCC), Western grebe (WG), red-throated loon (RTL), and common loon (CL). Attachment points are fleshy unless otherwise noted. GF do not swim. MA, CG, and MS are surface-swimmers of increasing body mass. DCC, WG, RTL, and CL are divers, with the DCC representing an intermediate specialization since it retains the ability to walk. A key for muscle abbreviations can be found in Tables 1 and 2.

|     | ILPO                                                                                                                                                                             | ILPR                                                                                                                                                                                                                    |
|-----|----------------------------------------------------------------------------------------------------------------------------------------------------------------------------------|-------------------------------------------------------------------------------------------------------------------------------------------------------------------------------------------------------------------------|
| GF  | O: Aponeurosis from the caudal 1/2 of the preacetabular iliac crest.<br>I: FT aponeurosis to the patellar tendon, lateral patella and GM.                                        | O: The postacetabular iliac crest with some fibers arising underneath FCL from the ischium.<br>I: FT aponeurosis to the lateral patella and cnemial crest with connections to SFPPDII.                                  |
| MA  | O: Aponeurosis from the caudal 1/2 of the preacetabular iliac crest.<br>I: FT aponeurosis to the lateral cnemial crest, the patella, the patellar tendon and FL.                 | O: Cranial 1/2 of the postacetabular iliac crest.<br>I: FT aponeurosis to the lateral patella and cnemial crest with connections to SFPPDII.                                                                            |
| CG  | O: Aponeurosis from the caudal 1/2 of the preacetabular iliac crest.<br>I: FT aponeurosis to the lateral cnemial crest, the patella, the patellar tendon and FL.                 | O: Aponeurosis covering the trochanter of the femur that inserts onto the ilium just dorsal and posterior to the acetabulum.<br>I: FT aponeurosis to the lateral patella and cnemial crest with connections to SFPPDII. |
| MS  | O: Aponeurosis from the caudal 2/3 of the preacetabular iliac crest.<br>I: FT aponeurosis to the patella and lateral cnemial crest and with connections to SFPPDII and SFPPDIII. | O: Aponeurosis from the most cranial postacetabular iliac crest.<br>I: FT aponeurosis to the lateral patella and cnemial crest with connections to SFPPDII.                                                             |
| DCC | O: Aponeurosis from caudal 1/2 of preacetabular iliac crest.<br>I: FT aponeurosis to the patella and lateral cnemial crest and with connections to SFPPDIII.                     | O: Aponeurosis from the iliac crest just posterior to the acetabulum.<br>I: FT aponeurosis to the lateral cnemial crest and patella.                                                                                    |
| WG  | O: Fleshy from the most cranial section of preacetabular iliac crest partially overlaying IC.<br>I: Fleshy to the lateral patella.                                               | O: Cranial 1/2 of the postacetabular iliac crest.<br>I: Fleshy to the lateral cnemial crest with connections to the superficial digital flexors.                                                                        |
| RTL | O: Fleshy from the entire length of the preacetabular ilium and the most caudal lumbar vertebrae.<br>I: FT aponeurosis to the lateral cnemial crest.                             | O: Cranial 1/2 of the postacetabular iliac crest.<br>I: FT aponeurosis to the lateral cnemial crest.                                                                                                                    |
| CL  | O: Fleshy from the entire length of the preacetabular ilium and the most caudal lumbar vertebrae.<br>I: FT aponeurosis to the lateral cnemial crest.                             | O: Cranial 2/3 of the postacetabular iliac crest.<br>I: FT aponeurosis to the lateral cnemial crest.                                                                                                                    |

Table S1 – continued from previous page

|     | IC                                                                                                                                                                            | IFE                                                                                                                                                                                         |
|-----|-------------------------------------------------------------------------------------------------------------------------------------------------------------------------------|---------------------------------------------------------------------------------------------------------------------------------------------------------------------------------------------|
| GF  | O: Cranial 1/2 of the preacetabular ilium with close connection to ILPR.<br>I: Connection to FTI and GM with insertion on the anteromedial patella.                           | O: Iliac crest dorsal to the acetabulum.<br>I: Tendinous. Posterolateral femoral shaft just distal to the trochanter.                                                                       |
| MA  | O: Most cranial portion of the preacetabular iliac crest.<br>I: Medial cnemial crest of the tibiotarsus, anteromedial patella with connections to the GM.                     | O: Iliac crest dorsal and slightly caudal to the acetabulum.<br>I: Tendinous. Posterolateral femoral shaft distal to the trochanter and posterior to the ITCR insertion.                    |
| CG  | O: Most cranial portion of the preacetabular iliac crest.<br>I: Medial cnemial crest of the tibiotarsus, anteromedial patella with connections to the GM and FT fascia.       | O: Iliac crest dorsal and slightly caudal to the acetabulum.<br>I: Tendinous. Posterolateral femoral shaft distal to the trochanter.                                                        |
| MS  | O: Cranial, preacetabular ilium and iliac crest, and last free lumbar vertebrae.<br>I: Anteromedial patella and medial cnemial crest of the tibiotarsus.                      | O: Iliac crest dorsal and slightly caudal to the acetabulum.<br>I: Tendinous. Posterolateral femoral shaft distal to the trochanter.                                                        |
| DCC | O: Cranial 1/2 of the preacetabular iliac crest.<br>I: Anteromedial patella with connections to FL.                                                                           | O: Iliac crest dorsal to the acetabulum.<br>I: Tendinous. Posterolateral femoral shaft distal to the trochanter and proximal to the CFP tendon.<br>Notes: Relatively large muscle.          |
| WG  | O: Most cranial section of preacetabular ilium deep to ILPR.<br>I: Medial cnemial crest of the tibiotarsus.                                                                   | O: Iliac crest dorsal and slightly caudal to the acetabulum.<br>I: Tendinous. Posterolateral femoral shaft distal to the trochanter.<br>Notes: Muscle present contrary to previous studies. |
| RTL | O: 2-3 last lumbar vertebrae before synsacrum and most cranial aspect of the preacetabular ventral rim.<br>I: Medial cnemial crest of the tibiotarsus.                        | O: Iliac crest dorsal and slightly caudal to the acetabulum.<br>I: Tendinous. Posterolateral femoral shaft distal to the trochanter.                                                        |
| CL  | O: 2-3 last lumbar vertebrae before synsacrum and most cranial aspect of the preacetabular ventral rim.<br>I: Medial cnemial crest of the tibiotarsus with connections to GI. | O: Iliac crest dorsal and slightly caudal to the acetabulum.<br>I: Tendinous. Posterolateral femoral shaft distal to the trochanter.<br>Notes: Missing in some specimen                     |

Table S1 – continued from previous page

| ITCR |                                                                                                                                                                                                                                                                                                                                                                                                     |
|------|-----------------------------------------------------------------------------------------------------------------------------------------------------------------------------------------------------------------------------------------------------------------------------------------------------------------------------------------------------------------------------------------------------|
| GF   | <p>O: Cranial 2/3 of the ventral rim of the preacetabular iliac fossa.<br/>           I: Tendinous. Deep to the FTE onto the lateral femoral shaft. Attaches to the femur at 1/4 of its length distal to the hip joint.</p>                                                                                                                                                                         |
| MA   | <p>O: Ventral rim of the preacetabular iliac fossa.<br/>           I: Tendinous. Lateral femoral shaft just distal to the trochanter and proximal to the FTE. Attaches to the femur at 1/4 of its length distal to the hip joint.</p>                                                                                                                                                               |
| CG   | <p>O: Cranial 3/4 of the ventral rim of the preacetabular iliac fossa.<br/>           I: Tendinous. Lateral femoral shaft just distal to the trochanter and proximal to the FTE. Attaches to the femur at 1/4 of its length distal to the hip joint.</p>                                                                                                                                            |
| MS   | <p>O: Cranial 3/4 of the ventral rim of the preacetabular iliac fossa.<br/>           I: Tendinous. Lateral femoral shaft just distal to the trochanter, anterior to the FTE, and proximal to the FTM. Attaches to the femur between 1/8 and 1/4 of its length distal to the hip joint.</p>                                                                                                         |
| DCC  | <p>O: Cranial ventral rim of the preacetabular iliac fossa.<br/>           I: Tendinous. Deep to the FTE onto the lateral femoral shaft just distal to the trochanter. Attaches to the femur at 1/8 of its length distal to the hip joint.</p>                                                                                                                                                      |
| WG   | <p>O: Cranial ventral surface and rim of the preacetabular iliac fossa.<br/>           I: Mostly fleshy with small tendon. Lateral femoral shaft just distal to the trochanter, anterior to the FTE, and proximal to the FTM. Attaches to the femur between 1/8 and 1/4 of its length distal to the hip joint.<br/>           Notes: Well-developed muscle approximately equal in size to ITCA.</p> |
| RTL  | <p>O: Cranial ventral surface and rim of the preacetabular iliac fossa.<br/>           I: Tendinous. Lateral femoral shaft distal to the trochanter between FTE and FTM origins. Attaches to the femur at 1/4 of its length distal to the hip joint.<br/>           Notes: Well-developed muscle approximately equal in size to ITCA.</p>                                                           |
| CL   | <p>O: Cranial ventral surface and rim of the preacetabular iliac fossa.<br/>           I: Tendinous. Lateral femoral shaft distal to the trochanter, superficial to FTE and FTM origins. Attaches to the femur at 1/4 of its length distal to the hip joint.<br/>           Notes: Well-developed muscle approximately equal in size to ITCA.</p>                                                   |

Table S1 – continued from previous page

|     | ITM                                                                                                                                                                                            | ITCA                                                                                    |
|-----|------------------------------------------------------------------------------------------------------------------------------------------------------------------------------------------------|-----------------------------------------------------------------------------------------|
| GF  | O: Ventral rim on the preacetabular iliac fossa caudal to the ITCR.<br>I: Tendinous. Lateral surface of the femur just distal to the ITCA and proximal to the ITCR.                            | O: Preacetabular iliac fossa and iliac crest.<br>I: Tendinous. Trochanter of the femur. |
| MA  | O: Caudal 1/5 of the ventral rim of the preacetabular iliac fossa.<br>I: Tendinous. Forms a thin tendon, which fuses with the proximal ITCR.                                                   | O: Preacetabular iliac fossa and iliac crest.<br>I: Tendinous. Trochanter of the femur. |
| CG  | O: Caudal 1/5 of the ventral rim of the preacetabular iliac fossa.<br>I: Tendinous. Forms a thin tendon, which fuses with the proximal ITCR.                                                   | O: Preacetabular iliac fossa and iliac crest.<br>I: Tendinous. Trochanter of the femur. |
| MS  | O: Caudal 1/4 of the ventral rim of the preacetabular iliac fossa.<br>I: Tendinous. Lateral femoral shaft proximal to the ITCR tendon and deep to the ITCA tendon.                             | O: Preacetabular iliac fossa and iliac crest.<br>I: Tendinous. Trochanter of the femur. |
| DCC | Missing or fused with ITCR.                                                                                                                                                                    | O: Preacetabular iliac fossa and iliac crest.<br>I: Tendinous. Trochanter of the femur. |
| WG  | O: Most caudal portion of the ventral rim of the preacetabular iliac fossa.<br>I: Tendinous. Thin tendon onto the lateral femoral shaft just proximal to the ITCR and deep to the ITCA tendon. | O: Preacetabular iliac fossa and iliac crest.<br>I: Tendinous. Trochanter of the femur. |
| RTL | O: Caudal 1/4 of the ventral rim of the preacetabular iliac fossa.<br>I: Tendinous. Lateral femoral shaft just distal to the trochanter and deep to the ITCA tendon.                           | O: Preacetabular iliac fossa and iliac crest.<br>I: Tendinous. Trochanter of the femur. |
| CL  | O: Caudal 1/4 of the ventral rim of the preacetabular iliac fossa.<br>I: Tendinous. Lateral femoral shaft just distal to the trochanter and deep to the ITCA tendon.                           | O: Preacetabular iliac fossa and iliac crest.<br>I: Tendinous. trochanter of the femur. |

Table S1 – continued from previous page

|       | IF                                                                                                                                                                                                                | IS                                                                                                                                                     |
|-------|-------------------------------------------------------------------------------------------------------------------------------------------------------------------------------------------------------------------|--------------------------------------------------------------------------------------------------------------------------------------------------------|
| GF    | O: Entire length of the postacetabular iliac crest.<br>I: Tendinous. Fibular tubercle 1/3rd of the way down the tibiotarsus from the knee joint.                                                                  | O: Lateral surface of the ischium and ilioischiatric membrane.<br>I: Tendinous. Posterolateral femoral shaft just distal to the trochanter.            |
| MA    | O: Cranial 1/2 of the dorsal postacetabular ilium deep to the ILPO.<br>I: Tendinous. Small aponeurosis to the GL/GI. Large tendon to fibular tubercle ~1/3rd of the way down the tibiotarsus from the knee joint. | O: Lateral surface of the ischium and ilioischiatric membrane.<br>I: Tendinous. Posterolateral femoral shaft just distal to the trochanter.            |
| CG    | O: Cranial 1/2 of the postacetabular iliac crest and dorsal ilium.<br>I: Tendinous. Small aponeurosis to the GL/GI. Large tendon to fibular tubercle ~1/3rd of the way down the tibiotarsus from the knee joint.  | O: Lateral surface of the ischium and ilioischiatric membrane.<br>I: Tendinous. Posterolateral femoral shaft just distal to the trochanter.            |
| MS    | O: Cranial 1/2 of the postacetabular iliac crest and dorsal ilium.<br>I: Tendinous. Fibular tubercle 1/3rd of the way down the tibiotarsus from the knee joint.                                                   | O: Cranial ischium.<br>I: Tendinous. Posterolateral head of the femur.                                                                                 |
| DCC   | O: Cranial 3/4 of the postacetabular iliac crest and dorsal ilium.<br>I: Tendinous. Fibular tubercle 1/3rd of the way down the tibiotarsus from the knee joint.                                                   | Absent. References to an IS muscle in previous records misidentify the CFP.                                                                            |
| WG    | O: Entire length of postacetabular iliac crest and dorsal ilium.<br>I: Tendinous. Fibular tubercle 1/2 of the way down the tibiotarsus from the knee joint.                                                       | O: Cranial postacetabular ilium and ischium<br>I: Tendinous. Posterolateral surface of the trochanter.                                                 |
| RTL   | O: Cranial 1/2 of the postacetabular iliac crest with connections to the CFP.<br>I: Tendinous. Fibular tubercle 1/2 of the way down the tibiotarsus from the knee joint.                                          | O: Cranial postacetabular ilium, ischium and the ilioischiatric membrane.<br>I: Tendinous. Posterolateral femoral shaft just distal to the trochanter. |
| CL    | O: Cranial 2/3 of the postacetabular iliac crest and dorsal ilium.<br>I: Tendinous. Fibular tubercle 1/2 of the way down the tibiotarsus from the knee joint.                                                     | O: Cranial postacetabular ilium, ischium and the ilioischiatric membrane.<br>I: Tendinous. Posterolateral femoral shaft just distal to the trochanter. |
| Notes | Tendon travels through the ansa fibularis (IF loop) before inserting.                                                                                                                                             |                                                                                                                                                        |

Table S1 – continued from previous page

|     | FCL                                                                                                                                                                                                                                                                     |
|-----|-------------------------------------------------------------------------------------------------------------------------------------------------------------------------------------------------------------------------------------------------------------------------|
| GF  | <p>O: Most caudal portion of the postacetabular ilium and the first free caudal vertebrae</p> <p>I: Main body inserts on proximal 10% of posterior tibiotarsus shaft, with connections to GI and FCM. Accessory head inserts on the distal posterior femoral shaft.</p> |
| MA  | <p>O: Caudal 1/2 of the postacetabular ilium and 1-2 adjacent caudal vertebrae.</p> <p>I: Proximal 20% of the posterior tibiotarsus shaft between the GM and GI, with connection to FCM.</p>                                                                            |
| CG  | <p>O: Caudal 1/2 of the postacetabular ilium and adjacent 1-2 caudal vertebrae</p> <p>I: Posterior tibiotarsus shaft at 1/4 shaft length distal to the knee. Travels between GM and GI, with connection to FCM.</p>                                                     |
| MS  | <p>O: Caudal 1/2 of the postacetabular ilium and adjacent 1-2 caudal vertebrae</p> <p>I: Posterior tibiotarsus shaft at 1/4 shaft length distal to the knee. Travels between GM and GI, with connection to FCM.</p>                                                     |
| DCC | <p>O: Caudal third of the postacetabular ilium and adjacent 1-2 caudal vertebrae</p> <p>I: Tendinous. Posterior tibiotarsus shaft at 1/3 shaft length distal to the knee. Travels between GM and GI, with connection to FCM.</p>                                        |
| WG  | <p>O: Caudal 1/2 of the postacetabular ilium.</p> <p>I: Posterior tibiotarsus shaft at 1/2 shaft length distal to the knee. Strong connection with GM, GI, and FCM.</p>                                                                                                 |
| RTL | <p>O: Most caudal portion of the ilium and ischium with connections to the CFP.</p> <p>I: Tendinous. Posterior tibiotarsus shaft at 1/3 shaft length distal to the knee, with connection to FCM.</p>                                                                    |
| CL  | <p>O: Most caudal portion of the ilium and ischium with connections to the CFP</p> <p>I: Tendinous. Posterior tibiotarsus shaft at 1/3 shaft length distal to the knee, with connection to FCM.</p>                                                                     |

Table S1 – continued from previous page

|     | CFP                                                                                                                                                                                 | CFC                                                                                                                                                                               |
|-----|-------------------------------------------------------------------------------------------------------------------------------------------------------------------------------------|-----------------------------------------------------------------------------------------------------------------------------------------------------------------------------------|
| GF  | O: Inside the postacetabular iliac rim and along the ischiatic process.<br>I: Mixed tendinous and fleshy. Proximal posterolateral femoral shaft.                                    | O: Ventral, cranial pygostyle.<br>I: Tendinous. Posterolateral femoral shaft about 1/4 of its length distal to the hip. Passes between the FCL and FCM.                           |
| MA  | O: Caudal 1/2 of the lateral postacetabular ilium and ischiatic process.<br>I: Mixed tendinous and fleshy. Proximal 1/3 of the posterolateral femoral shaft.                        | O: Ventral, cranial pygostyle.<br>I: Tendinous. Posterolateral femoral shaft about 1/3 of its length distal to the hip. Deep to FCL, superficial to FCM.                          |
| CG  | O: Caudal 2/3 of the lateral postacetabular ilium and ischiatic process.<br>I: Tendinous. Proximal 1/3 of the posterolateral femoral shaft.                                         | O: Ventral, cranial pygostyle.<br>I: Tendinous. Posterolateral femoral shaft about 1/3 of its length distal to the hip. Deep to FCL, superficial to FCM.                          |
| MS  | O: Caudal 2/3 of the lateral postacetabular ilium and ischiatic process.<br>I: Tendinous. Proximal 1/3 of the posterolateral femoral shaft.                                         | O: Ventral, cranial pygostyle.<br>I: Tendinous. Posterolateral femoral shaft about 1/3 of its length distal to the hip. Deep to FCL, superficial to FCM.                          |
| DCC | O: Caudal 1/2 of the lateral postacetabular ilium and ischiatic process.<br>I: Tendinous. Proximal 1/2 of the posterolateral femoral shaft.<br>Notes: Previously referred to as IS. | O: Ventral, cranial pygostyle.<br>I: Tendinous. Posterolateral femoral shaft about 1/2 of its length distal to the hip. Deep to FCL, superficial to FCM.                          |
| WG  | O: Caudal 1/2 of the lateral postacetabular ilium and ischiatic process.<br>I: Tendinous. Proximal posterolateral femoral shaft at 1/3 its length distal to the hip.                | Absent.                                                                                                                                                                           |
| RTL | O: Caudal 3/4 of the lateral postacetabular ilium and ischiatic process.<br>I: Tendinous. Proximal posterolateral femoral shaft at 1/2 its length distal to the hip.                | O: Ventral, cranial pygostyle.<br>I: Tendinous. Fuses with CFP tendon to posterolateral femoral shaft about 1/2 of its length distal to the hip. Deep to FCL, superficial to FCM. |
| CL  | O: Caudal 3/4 of the lateral postacetabular ilium and ischiatic process.<br>I: Tendinous and fleshy. Proximal posterolateral femoral shaft at 1/2 its length distal to the knee.    | O: Ventral, cranial pygostyle.<br>I: Tendinous. Fuses with CFP tendon to posterolateral femoral shaft about 1/2 of its length distal to the hip. Deep to FCL, superficial to FCM. |

Table S1 – continued from previous page

|       | FCM                                                                                                                                                                                                                                           | OB                                                                                                                                                                            |
|-------|-----------------------------------------------------------------------------------------------------------------------------------------------------------------------------------------------------------------------------------------------|-------------------------------------------------------------------------------------------------------------------------------------------------------------------------------|
| GF    | <p>O: Ventral border of the ischium.<br/>                     I: Aponeurosis of the GI with connections to FCL.<br/>                     Notes: Narrow, strap-like muscle.</p>                                                                | <p>O: Medial surface of the ischium, pubis and isciopubic fenestra.<br/>                     I: Tendinous. Posterior proximal margin of the femoral head.</p>                 |
| MA    | <p>O: Caudal ventral border of the ischium.<br/>                     I: Proximal, posterior tibiotarsus shaft between the GM and GI.<br/>                     Notes: Narrow, strap-like muscle.</p>                                           | <p>O: Medial surface of the ischium, pubis and isciopubic fenestra.<br/>                     I: Tendinous. Posterior proximal margin of the femoral head.</p>                 |
| CG    | <p>O: Caudal ventral border of the ischium.<br/>                     I: Proximal, posterior tibiotarsus shaft between the GM and GI.<br/>                     Notes: Narrow, strap-like muscle.</p>                                           | <p>O: Medial surface of the ischium, pubis and isciopubic fenestra.<br/>                     I: Tendinous. Posterior proximal margin of the femoral head.</p>                 |
| MS    | <p>O: Full length of the ventral border of the ischium.<br/>                     I: Fuses with FCL tendon to insert on the proximal posterior shaft of the tibiotarsus.<br/>                     Notes: Wide, somewhat triangular muscle.</p> | <p>O: Medial surface of the ischium, pubis and isciopubic fenestra.<br/>                     I: Tendinous. Posterior proximal margin of the femoral head.</p>                 |
| DCC   | <p>O: Caudal ventral border of the ischium and caudal pubis.<br/>                     I: Posterior tibiotarsus shaft with FCL tendon.<br/>                     Notes: Narrow, strap-like muscle.</p>                                          | <p>O: Medial surface of the ischium, pubis and isciopubic fenestra.<br/>                     I: Tendinous. Proximal lateral margin of the femoral head.</p>                   |
| WG    | <p>O: Caudal ventral border of the ischium.<br/>                     I: Posterior tibiotarsus shaft with FCL tendon.<br/>                     Notes: Narrow, very thin, strap-like muscle.</p>                                                | <p>O: Medial surface of the ischium, pubis and isciopubic fenestra.<br/>                     I: Tendinous. Proximal lateral margin of the femoral head deep to IS tendon.</p> |
| RTL   | <p>O: Middle 1/3 of the ventral border of the ischium.<br/>                     I: Posterior tibiotarsus shaft with FCL tendon.<br/>                     Notes: Narrow, strap-like muscle.</p>                                                | <p>O: Medial surface of the ischium, pubis and isciopubic fenestra.<br/>                     I: Tendinous. Proximal lateral margin of the femoral head deep to IS tendon.</p> |
| CL    | <p>O: Middle 1/3 of the ventral border of the ischium.<br/>                     I: Posterior tibiotarsus shaft with FCL tendon.<br/>                     Notes: Narrow, strap-like muscle.</p>                                                | <p>O: Medial surface of the ischium, pubis and isciopubic fenestra.<br/>                     I: Tendinous. Proximal lateral margin of the femoral head deep to IS tendon.</p> |
| Notes |                                                                                                                                                                                                                                               | <p>Includes both externus and internus muscles.</p>                                                                                                                           |



Table S1 – continued from previous page

|     | PIFM                                                                                                                                                                                                                                                 | PIFL                                                                                                                                                                  |
|-----|------------------------------------------------------------------------------------------------------------------------------------------------------------------------------------------------------------------------------------------------------|-----------------------------------------------------------------------------------------------------------------------------------------------------------------------|
| GF  | <p>O: Cranial 1/3 of the ventral ischium and the aponeurosis of PIFM.<br/>           I: Distal 1/2 of the posterior femoral shaft.<br/>           Notes: Strap-like muscle superficial to cranial PIFM.</p>                                          | <p>O: Aponeurosis from the cranial 2/3 of the ischium, pubis, and ischiopubic fenestra.<br/>           I: Distal posterior femoral shaft.</p>                         |
| MA  | <p>O: Cranial 1/3 of the ventral ischium and the ischiopubic fenestra.<br/>           I: Distal 1/2 of the posterior femoral shaft.<br/>           Notes: Strap-like muscle superficial to caudal PIFM.</p>                                          | <p>O: Aponeurosis from the entire ischium, pubis, and ischiopubic fenestra.<br/>           I: Distal posterior femoral shaft.</p>                                     |
| CG  | <p>O: Cranial 1/3 of the ventral ischium and the ischiopubic fenestra.<br/>           I: Distal 1/3 of the posterior femoral shaft.<br/>           Notes: Strap-like muscle superficial to caudal PIFM.</p>                                          | <p>O: Aponeurosis from the entire ischium, pubis, and ischiopubic fenestra.<br/>           I: Distal 1/3 of the posterior femoral shaft.</p>                          |
| MS  | <p>O: Cranial 1/3 of the ventral ischium and the ischiopubic fenestra.<br/>           I: Distal 1/4 of the posterior femoral shaft and intercondylar region.<br/>           Notes: Strap-like muscle superficial to cranial PIFM.</p>                | <p>O: Aponeurosis from the entire ischium, pubis, and ischiopubic fenestra.<br/>           I: Distal 1/4 of the posterior femoral shaft and intercondylar region.</p> |
| DCC | <p>O: Ventral ischium and ischiopubic fenestra caudal to acetabulum at 1/3 the ischium's length.<br/>           I: Distal posterior femoral shaft and intercondylar region.<br/>           Notes: Strap-like muscle superficial to cranial PIFM.</p> | <p>O: Aponeurosis from the central ischium, pubis, and ischiopubic fenestra.<br/>           I: Intercondylar region of the femur.</p>                                 |
| WG  | <p>O: Ventral ischium and ischiopubic fenestra.<br/>           I: Distal posterior femoral shaft and intercondylar region.<br/>           Notes: Strap-like muscle superficial to caudal PIFM.</p>                                                   | <p>O: Aponeurosis from the cranial ischium, pubis, and ischiopubic fenestra.<br/>           I: Intercondylar region of the femur.</p>                                 |
| RTL | <p>O: Entire length of the ventral ischium, the ischiopubic fenestra, and the pubis.<br/>           I: Most distal posterior femoral shaft and intercondylar region.<br/>           Notes: Fused into single muscle mass with PIFM.</p>              | <p>Fused with PIFL.</p>                                                                                                                                               |
| CL  | <p>O: Entire length of the ventral ischium, the ischiopubic fenestra, and the pubis.<br/>           I: Most distal posterior femoral shaft and intercondylar region.<br/>           Notes: Fused into single muscle mass with PIFM.</p>              | <p>Fused with PIFL.</p>                                                                                                                                               |

Table S1 – continued from previous page

|       | AM                                                                                                                                                 | IFI                                                                                                                   |
|-------|----------------------------------------------------------------------------------------------------------------------------------------------------|-----------------------------------------------------------------------------------------------------------------------|
| GF    | O: Tendinous. Pectineal process of the pubis.<br>I: Tendinous. Common digital flexor tendon.                                                       | O: Ilium ventral to ITM.<br>I: Proximal medial femoral shaft.                                                         |
| MA    | O: Tendinous. Pectineal process of the pubis.<br>I: Tendinous. Common digital flexor tendon.                                                       | O: Cranial, ventral portion of the postacetabular ilium.<br>I: Proximal medial femoral shaft.                         |
| CG    | O: Tendinous. Pectineal process of the pubis.<br>I: Tendinous. Common digital flexor tendon.                                                       | O: Cranial, ventral portion of the postacetabular ilium.<br>I: Proximal medial femoral shaft.                         |
| MS    | O: Tendinous. Pectineal process of the pubis.<br>I: Tendinous. Common digital flexor tendon.                                                       | O: Cranial, ventral portion of the postacetabular ilium.<br>I: Proximal medial femoral shaft.                         |
| DCC   | O: Tendinous. Pectineal process of the pubis.<br>I: Tendinous. Common digital flexor tendon.                                                       | O: Cranial, ventral portion of the postacetabular ilium.<br>I: Proximal medial femoral shaft.                         |
| WG    | Absent.                                                                                                                                            | O: Cranial, ventral portion of the postacetabular ilium.<br>I: Proximal medial femoral shaft.                         |
| RTL   | O: Tendinous. Pectineal process of the pubis.<br>I: Tendinous. Common digital flexor tendon.                                                       | O: Ventral caudal preacetabular ilium.<br>I: Tubercle on medial femoral neck.<br>Notes: Muscle strongly developed.    |
| CL    | O: Tendinous. Pectineal process of the pubis.<br>I: Tendinous. Common digital flexor tendon.                                                       | O: Ventral caudal preacetabular ilium.<br>I: I: Tubercle on medial femoral neck.<br>Notes: Muscle strongly developed. |
| Notes | Insertion tendon dives under the GM, along a groove in the patella, and through the patellar tendon to fuse with the common digital flexor tendon. |                                                                                                                       |

**Table S2:** Limb musculature origins and insertions. This table shows the origin and insertion of major pelvic muscles dissected in the helmeted guineafowl (GF), mallard (MA), Canada goose (CG), mute swan (MS), double-crested cormorant (DCC), Western grebe (WG), red-throated loon (RTL), and common loon (CL). Attachment points are fleshy unless otherwise noted. GF do not swim. MA, CG, and MS are surface-swimmers of increasing body mass. DCC, WG, RTL, and CL are divers, with the DCC representing an intermediate specialization since it retains the ability to walk. A key for muscle abbreviations can be found in Tables 1 and 2.

|     | FTE                                                                                                                                                         |
|-----|-------------------------------------------------------------------------------------------------------------------------------------------------------------|
| GF  | O: Posterolateral shaft of the femur over most of its length.<br>I: Aponeurosis to the patella. Posterior tendon to the lateral condyle of the tibiotarsus. |
| MA  | O: Posterolateral shaft of the femur over most of its length.<br>I: Aponeurosis to the patella. Posterior tendon to the lateral cnemial crest and SFPPDII.  |
| CG  | O: Posterolateral shaft of the femur over most of its length.<br>I: Aponeurosis to the patella. Posterior tendon to the lateral cnemial crest and SFPPDII.  |
| MS  | O: Posterolateral shaft of the femur over most of its length.<br>I: Aponeurosis to the patella. Posterior tendon to the lateral cnemial crest and SFPPDII.  |
| DCC | O: Posterolateral shaft of the femur over most of its length.<br>I: Aponeurosis to the patella. Posterior tendon to the lateral cnemial crest and SFPPDII.  |
| WG  | O: Posterolateral shaft of the femur over most of its length.<br>I: Fleshy to lateral cnemial crest and distal, lateral patella.                            |
| RTL | O: Posterolateral shaft of the femur over most of its length.<br>I: Aponeurosis to the distal, lateral cnemial crest.                                       |
| CL  | O: Posterolateral shaft of the femur over most of its length.<br>I: Aponeurosis to the distal, lateral cnemial crest.                                       |

Table S2 – continued from previous page

|     | FTM                                                                                                               | FTI                                                             |
|-----|-------------------------------------------------------------------------------------------------------------------|-----------------------------------------------------------------|
| GF  | O: Anterior and anterolateral femoral shaft.<br>I: Aponeurosis and fleshy to the patella.                         | O: Medial femoral shaft.<br>I: Tendinous. Medial cnemial crest. |
| MA  | O: Anterior femoral shaft and neck of the femur.<br>I: Aponeurosis and fleshy to the patella.                     | O: Medial femoral shaft.<br>I: Tendinous. Medial cnemial crest. |
| CG  | O: Anterior femoral shaft and neck of the femur.<br>I: Aponeurosis and fleshy to the patella.                     | O: Medial femoral shaft.<br>I: Tendinous. Medial cnemial crest. |
| MS  | O: Anterior and proximal, lateral femoral shaft.<br>I: Aponeurosis and fleshy to the patella.                     | O: Medial femoral shaft.<br>I: Tendinous. Medial cnemial crest. |
| DCC | O: Anterior femoral shaft.<br>I: Aponeurosis and fleshy to dorsal patella.                                        | O: Medial femoral shaft.<br>I: Tendinous. Medial cnemial crest. |
| WG  | O: Anterior femoral shaft.<br>I: Entire posterior surface of the patella.<br>Notes: Much larger than FTE and FTI. | O: Medial femoral shaft.<br>I: Medial cnemial crest.            |
| RTL | O: Anterior femoral shaft.<br>I: Entire posterior cnemial crest.<br>Notes: Much larger than FTE and FTI.          | O: Medial femoral shaft.<br>I: Distal medial cnemial crest.     |
| CL  | O: Anterior femoral shaft.<br>I: Entire posterior cnemial crest.<br>Notes: Much larger than FTE and FTI.          | O: Medial femoral shaft.<br>I: Distal medial cnemial crest.     |

Table S2 – continued from previous page

|     | FL                                                                                                                                                                                                                                                                                      |
|-----|-----------------------------------------------------------------------------------------------------------------------------------------------------------------------------------------------------------------------------------------------------------------------------------------|
| GF  | O: Lateral cnemial crest and lateral patellar tendon. Connections to TC, SFPPDIII, and SFPPDII.<br>I: Tendinous. Anterior tendon fuses with tendon of FPDIII. Posterior tendon inserts at proximal, lateral tibial cartilage.                                                           |
| MA  | O: Lateral cnemial crest and lateral patellar tendon. Connections to TC, SFPPDIII, and SFPPDII.<br>I: Tendinous. Anterior tendon fuses with tendon of FPDIII. Posterior tendon inserts at proximal, lateral tibial cartilage.                                                           |
| CG  | O: Lateral cnemial crest and lateral patellar tendon. Connections to TC, SFPPDIII, and SFPPDII.<br>I: Tendinous. Anterior tendon fuses with tendon of FPDIII. Posterior tendon inserts at proximal, lateral tibial cartilage.                                                           |
| MS  | O: Lateral cnemial crest and lateral patellar tendon. Connections to TC, SFPPDIII, and SFPPDII.<br>I: Tendinous. Anterior tendon fuses with tendon of FPDIII. Posterior tendon inserts at proximal, lateral tibial cartilage.                                                           |
| DCC | O: Tendinous from lateral cnemial crest and anterolateral proximal tibial shaft. Fleshy from the lateral fibula. Connections to TC, SFPPDIII and SFPPDII.<br>I: Tendinous. Anterior tendon fuses with tendon of FPDIII. Posterior tendon inserts at proximal, lateral tibial cartilage. |
| WG  | O: Tendinous from anteromedial cnemial crest. Fleshy from the lateral fibular shaft. Connections to TC, SFPPDIII and SFPPDII.<br>I: Tendinous. Proximal, lateral tibial cartilage.                                                                                                      |
| RTL | O: Anterior cnemial crest and lateral fibular shaft. Connections to TC, SFPPDIII and SFPPDII.<br>I: Tendinous. Proximal, lateral tibial cartilage. Small slip to FPDIII tendon.                                                                                                         |
| CL  | O: Anterior cnemial crest and lateral fibular shaft. Connections to TC, SFPPDIII and SFPPDII.<br>I: Tendinous. Proximal, lateral tibial cartilage. Small slip to FPDIII tendon.                                                                                                         |

Table S2 – continued from previous page

|       | TC                                                                                                                                                                                                                                                                                     |
|-------|----------------------------------------------------------------------------------------------------------------------------------------------------------------------------------------------------------------------------------------------------------------------------------------|
| GF    | <p>O: Large head from anterolateral cnemial crest and anterior patellar tendon. Tendinous small head from anterolateral femoral condyle inside knee joint.</p> <p>I: Dorsal surface of proximal tarsometatarsus.</p>                                                                   |
| MA    | <p>O: Large head from anterolateral cnemial crest, anterior patellar tendon, and proximal anterior tibiotarsus. Tendinous small head from anterolateral femoral condyle inside knee joint.</p> <p>I: Dorsal surface of proximal tarsometatarsus.</p>                                   |
| CG    | <p>O: Large head from anterolateral cnemial crest, anterior patellar tendon, and proximal anterior tibiotarsus. Tendinous small head from anterolateral femoral condyle inside knee joint.</p> <p>I: Dorsal surface of proximal tarsometatarsus.</p>                                   |
| MS    | <p>O: Large head from anterolateral cnemial crest, anterior patellar tendon, and proximal anterior tibiotarsus. Tendinous small head from anterolateral femoral condyle inside knee joint.</p> <p>I: Dorsal surface of proximal tarsometatarsus.</p>                                   |
| DCC   | <p>O: Large head from anterolateral cnemial crest, anterior patellar tendon, and proximal anterior tibiotarsus. Tendinous small head from anterolateral femoral condyle inside knee joint.</p> <p>I: Dorsal surface of proximal tarsometatarsus.</p>                                   |
| WG    | <p>O: Large head from anterolateral cnemial crest and patella. Small head from anterior tibiotarsus and tendinous to anterolateral femoral condyle inside knee joint.</p> <p>I: Dorsal surface of proximal tarsometatarsus.</p> <p>Notes: Insertion tendon is partially calcified.</p> |
| RTL   | <p>O: Large head from anterolateral cnemial crest. Tendinous small head from anterolateral femoral condyle inside knee joint.</p> <p>I: Dorsal surface of proximal tarsometatarsus.</p>                                                                                                |
| CL    | <p>O: Large head from anterolateral cnemial crest. Tendinous small head from anterolateral femoral condyle inside knee joint.</p> <p>I: Dorsal surface of proximal tarsometatarsus.</p>                                                                                                |
| Notes | <p>Insertion tendon goes through retinaculum at intertarsal ankle joint.</p>                                                                                                                                                                                                           |

Table S2 – continued from previous page

|       | EDL                                                                                                                                        | FB                                                                                                           |
|-------|--------------------------------------------------------------------------------------------------------------------------------------------|--------------------------------------------------------------------------------------------------------------|
| GF    | O: Anteromedial cnemial crest and proximal tibiotarsus.<br>I: Tendinous. Ungual phalanx of digits II-IV, with slips to proximal phalanges. | O: Lateral tibiotarsus shaft and anterior fibular shaft.<br>I: Tendinous. Most proximal, lateral hypotarsus. |
| MA    | O: Anteromedial cnemial crest and proximal tibiotarsus.<br>I: Tendinous. Ungual phalanx of digits II-IV, with slips to proximal phalanges. | O: Distal anteriolateral fibula.<br>I: Tendinous. Most proximal, lateral hypotarsus.                         |
| CG    | O: Anteromedial cnemial crest and proximal tibiotarsus.<br>I: Tendinous. Ungual phalanx of digits II-IV, with slips to proximal phalanges. | O: Distal anteriolateral fibula.<br>I: Tendinous. Most proximal, lateral hypotarsus.                         |
| MS    | O: Anteromedial cnemial crest and proximal tibiotarsus.<br>I: Tendinous. Ungual phalanx of digits II-IV, with slips to proximal phalanges. | O: Distal lateral tibiotarsus and anterior fibula.<br>I: Tendinous. Most proximal, lateral hypotarsus.       |
| DCC   | O: Anteromedial cnemial crest and proximal tibiotarsus.<br>I: Tendinous. Ungual phalanx of digits II-IV, with slips to proximal phalanges. | O: Distal lateral tibiotarsus and anterior fibula.<br>I: Tendinous. Most proximal, lateral hypotarsus.       |
| WG    | O: Anteromedial cnemial crest and proximal tibiotarsus.<br>I: Tendinous. Ungual phalanx of digits II-IV, with slips to proximal phalanges. | Absent.                                                                                                      |
| RTL   | O: Anteromedial cnemial crest and proximal tibiotarsus.<br>I: Tendinous. Ungual phalanx of digits II-IV, with slips to proximal phalanges. | O: Distal lateral tibiotarsus and anterior fibula.<br>I: Tendinous. Most proximal, lateral hypotarsus.       |
| CL    | O: Anteromedial cnemial crest and proximal tibiotarsus.<br>I: Tendinous. Ungual phalanx of digits II-IV, with slips to proximal phalanges. | O: Distal lateral tibiotarsus and anterior fibula.<br>I: Tendinous. Most proximal, lateral hypotarsus.       |
| Notes | Tendon travels through retinaculum and bony canal on anterior distal tibiotarsus.                                                          |                                                                                                              |

Table S2 – continued from previous page

|     | GM                                                                                                                                                                                                        | GI                                                                                                                                                                                                             |
|-----|-----------------------------------------------------------------------------------------------------------------------------------------------------------------------------------------------------------|----------------------------------------------------------------------------------------------------------------------------------------------------------------------------------------------------------------|
| GF  | O: Anteromedial patella, medial cnemial crest, proximal tibial shaft.<br>With connections to FL.<br>I: Tendinous. Aponeurosis combines with that of GL to form common calcaneal tendon to the hypotarsus. | O: Posterior intercondylar region of the femur immediately distal to FCLA insertion.<br>I: Tendinous. Fibers insert onto the combined GL/GM aponeurosis, which becomes the calcaneal tendon to the hypotarsus. |
| MA  | O: Anteromedial patella, medial cnemial crest, proximal tibial shaft.<br>With connections to FL.<br>I: Tendinous. Fuses with GI tendon then GL tendon to the hypotarsus.                                  | O: Medial surface of medial femoral condyle.<br>I: Tendinous. Fuses with GM tendon, then the GL tendon. Inserts onto the hypotarsus.                                                                           |
| CG  | O: Anteromedial patella, medial cnemial crest, proximal tibial shaft.<br>With connections to FL.<br>I: Tendinous. Fuses with GI tendon then GL tendon to the hypotarsus.                                  | O: Medial surface of medial femoral condyle.<br>I: Tendinous. Fuses with GM tendon, then the GL tendon. Inserts onto the hypotarsus.                                                                           |
| MS  | O: Anteromedial patella, medial cnemial crest, proximal tibial shaft.<br>With connections to FL.<br>I: Tendinous. Fuses with GI tendon then GL tendon to the hypotarsus.                                  | O: Medial surface of medial femoral condyle.<br>I: Tendinous. Fuses with GM tendon, then the GL tendon. Inserts onto the hypotarsus.                                                                           |
| DCC | O: Anteromedial patella, medial cnemial crest, proximal tibial shaft.<br>With connections to FL.<br>I: Tendinous. Fuses with GI tendon then GL tendon to the hypotarsus.                                  | O: Medial surface of medial femoral condyle and proximal posteromedial tibial shaft.<br>I: Fibers fuse with GM.                                                                                                |
| WG  | O: Anteromedial cnemial crest, proximal 1/2 of medial tibiotarsus, and proximal tip of the posterior patella.<br>I: Tendinous. Fuses with GI tendon then GL tendon to the hypotarsus.                     | O: Medial surface of medial femoral condyle and proximal posteromedial tibial shaft.<br>I: Tendinous. Fuses with GM tendon, then the GL tendon. Inserts onto the hypotarsus.                                   |
| RTL | O: Anteromedial cnemial crest and proximal tibial shaft.<br>I: Tendinous. Fuses with GI tendon then GL tendon to the hypotarsus.                                                                          | O: Medial surface of medial femoral condyle and proximal posteromedial tibial shaft.<br>I: Tendinous. Fuses with GM tendon, then the GL tendon. Inserts onto the hypotarsus.                                   |
| CL  | O: Anteromedial cnemial crest and proximal tibial shaft.<br>I: Tendinous. Fuses with GI tendon then GL tendon to the hypotarsus.                                                                          | O: Medial surface of medial femoral condyle and proximal posteromedial tibial shaft.<br>I: Tendinous. Fuses with GM tendon, then the GL tendon. Inserts onto the hypotarsus.                                   |



Table S2 – continued from previous page

|     | GL                                                                                                                                                           | SFPPDII                                                                                                                                                                                                                                                      |
|-----|--------------------------------------------------------------------------------------------------------------------------------------------------------------|--------------------------------------------------------------------------------------------------------------------------------------------------------------------------------------------------------------------------------------------------------------|
| GF  | O: Distal, posterolateral femoral shaft.<br>I: Tendinous. Aponeurosis combines with that of GM to form common calcaneal tendon to the hypotarsus.            | O: Lateral femoral condyle. Connections to SFPPDIII and FL.<br>I: Tendinous. Distal basal phalanx and proximal phalanx 2 of digit II.                                                                                                                        |
| MA  | O: Tendinous. Distal, posterolateral femoral shaft.<br>I: Tendinous. Fuses with GM/GI tendon to the hypotarsus.                                              | O: One head from lateral femoral condyle. Other head from lateral cnemial crest. Connections to SFPPDIII and FL.<br>I: Tendinous. Distal basal phalanx and proximal phalanx 2 of digit II.                                                                   |
| CG  | O: Tendinous. Distal, posterolateral femoral shaft.<br>I: Tendinous. Fuses with GM/GI tendon to the hypotarsus.                                              | O: One head from lateral femoral condyle. Other head from lateral cnemial crest. Connections to SFPPDIII and FL.<br>I: Tendinous. Distal basal phalanx and proximal phalanx 2 of digit II.                                                                   |
| MS  | O: Tendinous. Distal, posterolateral femoral shaft.<br>I: Tendinous. Fuses with GM/GI tendon to the hypotarsus.                                              | O: One head from lateral femoral condyle. Other head from lateral cnemial crest. Connections to SFPPDIII and FL.<br>I: Tendinous. Distal basal phalanx and proximal phalanx 2 of digit II.                                                                   |
| DCC | O: Tendinous and fleshy. Distal, posterolateral femoral shaft.<br>I: Tendinous. Fuses with GM/GI tendon to the hypotarsus.                                   | O: Lateral femoral condyle, lateral femoral shaft just proximal to the condyle. Connections to SFPPDIII and FL.<br>I: Tendinous. Distal basal phalanx and proximal phalanx 2 of digit II.                                                                    |
| WG  | O: Distal, posterolateral femoral shaft.<br>I: Tendinous. Fuses with GM/GI tendon to the hypotarsus.                                                         | O: Lateral femoral condyle and lateral femoral shaft just proximal to the condyle. Connections to SFPPDIII and FL.<br>I: Tendinous. Distal basal phalanx and proximal phalanx 2 of digit II.                                                                 |
| RTL | O: Aponeurosis and fleshy. Distal 2/3 of posterolateral femoral shaft and lateral cnemial crest.<br>I: Tendinous. Fuses with GM/GI tendon to the hypotarsus. | I: Tendinous. Distal basal phalanx and proximal phalanx 2 of digit II.<br>Notes: Calcified tendon.                                                                                                                                                           |
| CL  | O: Aponeurosis and fleshy. Distal 2/3 of posterolateral femoral shaft.<br>I: Tendinous. Fuses with GM/GI tendon to the hypotarsus.                           | O: One head from lateral femoral condyle. Other head from anterolateral cnemial crest with connections to SFPPDIII and FL.<br>I: Tendinous. Distal basal phalanx and proximal phalanx 2 of digit II.<br>Notes: Tendon goes through bony canal in hypotarsus. |

Table S2 – continued from previous page

SFPPDIII

|     |                                                                                                                                                                                                                                                           |
|-----|-----------------------------------------------------------------------------------------------------------------------------------------------------------------------------------------------------------------------------------------------------------|
| GF  | O: Lateral femoral condyle, lateral cnemial crest, and patellar tendon. Connections to FL and FPDIII.<br>I: Tendinous. Distal phalanx 2 and proximal phalanx 3 of digit III.                                                                              |
| MA  | O: Lateral femoral condyle, lateral cnemial crest, lateral fibula, and the common digital flexor tendon.<br>I: Tendinous. Distal phalanx 2 and proximal phalanx 3 of digit III.                                                                           |
| CG  | O: Lateral femoral condyle, lateral cnemial crest, lateral fibula, and the common digital flexor tendon.<br>I: Tendinous. Distal phalanx 2 and proximal phalanx 3 of digit III.                                                                           |
| MS  | O: Lateral femoral condyle, lateral cnemial crest, lateral patella, lateral fibula, and the common digital flexor tendon. Connection to FL.<br>I: Tendinous. Distal phalanx 2 and proximal phalanx 3 of digit III.                                        |
| DCC | O: Lateral femoral condyle, lateral cnemial crest, lateral patella, lateral fibula, and the common digital flexor tendon. Connection to FL.<br>I: Tendinous. Distal phalanx 2 and proximal phalanx 3 of digit III.                                        |
| WG  | O: Lateral femoral condyle, lateral cnemial crest, lateral patella, lateral fibula, and the common digital flexor tendon. Connection to FL.<br>I: Tendinous. Distal phalanx 2 and proximal phalanx 3 of digit III.<br>Notes: Calcified tendon.            |
| RTL | O: Lateral femoral condyle, lateral cnemial crest, lateral fibula, and the common digital flexor tendon. Connection to FL.<br>I: Tendinous. Distal phalanx 2 and proximal phalanx 3 of digit III.<br>Notes: Tendon goes through bony canal in hypotarsus. |
| CL  | O: Lateral femoral condyle, lateral cnemial crest, lateral fibula, and the common digital flexor tendon. Connection to FL.<br>I: Tendinous. Distal phalanx 2 and proximal phalanx 3 of digit III.<br>Notes: Tendon goes through bony canal in hypotarsus. |

Table S2 – continued from previous page

SFPD<sub>IV</sub>

|     |                                                                                                                                                                                                                                                                                                         |
|-----|---------------------------------------------------------------------------------------------------------------------------------------------------------------------------------------------------------------------------------------------------------------------------------------------------------|
| GF  | O: Larger posteromedial head from the intercondylar region of the femur and the ansa fibularis. Smaller anterolateral head tendinous from common digital flexor tendon.<br>I: Tendinous. Proximal phalanx 4 of digit IV with slips to proximal interphalangeal joints.                                  |
| MA  | O: Larger posteromedial head from the intercondylar region of the femur, distal posterior femoral shaft, and the ansa fibularis. Smaller anterolateral head tendinous from common digital flexor tendon.<br>I: Tendinous. Proximal phalanx 4 of digit IV with slips to proximal interphalangeal joints. |
| CG  | O: Larger posteromedial head from the intercondylar region of the femur, distal posterior femoral shaft, and the ansa fibularis. Smaller anterolateral head tendinous from common digital flexor tendon.<br>I: Tendinous. Proximal phalanx 4 of digit IV with slips to proximal interphalangeal joints. |
| MS  | O: Larger posteromedial head from the intercondylar region of the femur, distal posterior femoral shaft, and the ansa fibularis. Smaller anterolateral head tendinous from common digital flexor tendon.<br>I: Tendinous. Proximal phalanx 4 of digit IV with slips to proximal interphalangeal joints. |
| DCC | O: Larger posteromedial head from the distal posterior femoral shaft and the ansa fibularis. Smaller anterolateral head tendinous from common digital flexor tendon.<br>I: Tendinous. Proximal phalanx 4 of digit IV with slips to proximal interphalangeal joints.                                     |
| WG  | O: Large ahead from the distal posterior femoral shaft and the ansa fibularis.<br>I: Tendinous. Proximal phalanx 3 of digit IV with slips to proximal interphalangeal joints.<br>Notes: Calcified tendon.                                                                                               |
| RTL | O: Large head from the distal 1/2 of posterior femoral shaft, the ansa fibularis, and FPD <sub>III</sub> medial head tendon.<br>I: Tendinous. Proximal phalanx 2 of digit IV with slips to proximal interphalangeal joints.<br>Notes: Tendon goes through bony canal in hypotarsus.                     |
| CL  | O: Large head from the distal 1/2 of posterior femoral shaft, the ansa fibularis, and FPD <sub>III</sub> medial head tendon.<br>I: Tendinous. Proximal phalanx 2 of digit IV with slips to proximal interphalangeal joints.<br>Notes: Tendon goes through bony canal in hypotarsus.                     |

Table S2 – continued from previous page

|     | FPDII                                                                                                                                                                                                                                                                                            |
|-----|--------------------------------------------------------------------------------------------------------------------------------------------------------------------------------------------------------------------------------------------------------------------------------------------------|
| GF  | <p>O: Medial head joins FPDIII tendon to most medial part of the intercondylar region of the femur. Lateral head tendinous from the common digital flexor tendon.</p> <p>I: Proximal basal phalanx (1) of digit II.</p> <p>Notes: Tendon goes through connective tissue canal in hypotarsus.</p> |
| MA  | <p>O: Medial head joins FPDIII tendon to most medial part of the intercondylar region of the femur. Lateral head tendinous from the common digital flexor tendon.</p> <p>I: Proximal basal phalanx (1) of digit II.</p> <p>Notes: Tendon goes through connective tissue canal in hypotarsus.</p> |
| CG  | <p>O: Medial head joins FPDIII tendon to most medial part of the intercondylar region of the femur. Lateral head tendinous from the common digital flexor tendon.</p> <p>I: Proximal basal phalanx (1) of digit II.</p> <p>Notes: Tendon goes through connective tissue canal in hypotarsus.</p> |
| MS  | <p>O: Medial head joins FPDIII tendon to most medial part of the intercondylar region of the femur. Lateral head tendinous from the common digital flexor tendon.</p> <p>I: Proximal basal phalanx (1) of digit II.</p> <p>Notes: Tendon goes through connective tissue canal in hypotarsus.</p> |
| DCC | <p>O: Medial head fleshy from lateral intercondylar region of femur. Lateral head tendinous from the common digital flexor tendon.</p> <p>I: Proximal basal phalanx (1) of digit II.</p> <p>Notes: Tendon goes through connective tissue canal in hypotarsus.</p>                                |
| WG  | Absent.                                                                                                                                                                                                                                                                                          |
| RTL | <p>O: Medial head fleshy from distal, posterior femoral shaft and FPDIII tendon. Lateral head tendinous from the common digital flexor tendon.</p> <p>I: Proximal basal phalanx (1) of digit II.</p> <p>Notes: Tendon goes through bony canal in hypotarsus.</p>                                 |
| CL  | <p>O: Medial head fleshy from distal, posterior femoral shaft and FPDIII tendon. Lateral head tendinous from the common digital flexor tendon.</p> <p>I: Proximal basal phalanx (1) of digit II.</p> <p>Notes: Tendon goes through bony canal in hypotarsus.</p>                                 |

Table S2 – continued from previous page

FPDIII

|     |                                                                                                                                                                                                                                                                                                                                                             |
|-----|-------------------------------------------------------------------------------------------------------------------------------------------------------------------------------------------------------------------------------------------------------------------------------------------------------------------------------------------------------------|
| GF  | O: Medial head tendinous from the medial intercondylar region of the femur. Lateral head tendinous from the common digital flexor tendon.<br>I: Tendinous. Distal basal phalanx (1) and proximal phalanx 2 of digit III.                                                                                                                                    |
| MA  | O: Medial head tendinous from the medial intercondylar region of the femur. Lateral head tendinous from the common digital flexor tendon.<br>I: Tendinous. Distal basal phalanx (1) and proximal phalanx 2 of digit III.                                                                                                                                    |
| CG  | O: Medial head tendinous from the medial intercondylar region of the femur. Lateral head tendinous from the common digital flexor tendon.<br>I: Tendinous. Distal basal phalanx (1) and proximal phalanx 2 of digit III.                                                                                                                                    |
| MS  | O: Medial head tendinous from the medial intercondylar region of the femur. Lateral head tendinous from the common digital flexor tendon.<br>I: Tendinous. Distal basal phalanx (1) and proximal phalanx 2 of digit III.                                                                                                                                    |
| DCC | O: Medial head tendinous from the medial intercondylar region of the femur. Lateral head tendinous from the common digital flexor tendon.<br>I: Tendinous. Distal basal phalanx (1) and proximal phalanx 2 of digit III.                                                                                                                                    |
| WG  | O: Medial head tendinous from the medial intercondylar region of the femur. Lateral head tendinous from the common digital flexor tendon.<br>I: Tendinous. Distal basal phalanx (1) and proximal phalanx 2 of digit III.<br>Notes: Medial head tendon calcified.                                                                                            |
| RTL | O: Medial head tendinous from the posterior femoral shaft $1/2$ down its length. Lateral head tendinous from the common digital flexor tendon.<br>I: Tendinous. Distal basal phalanx (1) and proximal phalanx 2 of digit III.<br>Notes: Muscle body short with long broad medial head tendon. Insertion tendon goes through a bony canal in the hypotarsus. |
| CL  | O: Medial head tendinous from the posterior femoral shaft $1/2$ down its length. Lateral head tendinous from the common digital flexor tendon.<br>I: Tendinous. Distal basal phalanx (1) and proximal phalanx 2 of digit III.<br>Notes: Muscle body short with long broad medial head tendon. Insertion tendon goes through a bony canal in the hypotarsus. |

Table S2 – continued from previous page

|       | FHL                                                                                                                                                         | FDL                                                                                                                                                                                              |
|-------|-------------------------------------------------------------------------------------------------------------------------------------------------------------|--------------------------------------------------------------------------------------------------------------------------------------------------------------------------------------------------|
| GF    | O: Lateral intercondylar region of the femur.<br>I: Tendon fuses with FDL tendon along TMT then splits to insert on unguis phalanx (1) of digit I (hallux). | O: One head to posterior tibial shaft. Other head to posterolateral fibula.<br>I: Tendon fuses with FHL tendon along TMT then splits into 3 parts to insert on unguis phalanges of digits II-IV. |
| MA    | O: Lateral intercondylar region of the femur.<br>I: Tendon fuses with FDL tendon along TMT then splits to insert on unguis phalanx (1) of digit I (hallux). | O: One head to posterior tibial shaft. Other head to posterolateral fibula.<br>I: Tendon fuses with FHL tendon along TMT then splits into 3 parts to insert on unguis phalanges of digits II-IV. |
| CG    | O: Lateral intercondylar region of the femur.<br>I: Tendon fuses with FDL tendon along TMT then splits to insert on unguis phalanx (1) of digit I (hallux). | O: One head to posterior tibial shaft. Other head to posterolateral fibula.<br>I: Tendon fuses with FHL tendon along TMT then splits into 3 parts to insert on unguis phalanges of digits II-IV. |
| MS    | O: Lateral intercondylar region of the femur.<br>I: Tendon fuses with FDL tendon along TMT then splits to insert on unguis phalanx (1) of digit I (hallux). | O: One head to posterior tibial shaft. Other head to posterolateral fibula.<br>I: Tendon fuses with FHL tendon along TMT then splits into 3 parts to insert on unguis phalanges of digits II-IV. |
| DCC   | O: Lateral intercondylar region of the femur.<br>I: Tendon fuses with FDL tendon along TMT then splits to insert on unguis phalanx (1) of digit I (hallux). | O: One head to posterior tibial shaft. Other head to posterolateral fibula.<br>I: Tendon fuses with FHL tendon along TMT then splits into 3 parts to insert on unguis phalanges of digits II-IV. |
| WG    | O: Lateral intercondylar region of the femur.<br>I: Tendon fuses with FDL tendon along TMT.                                                                 | O: One head to posterior tibial shaft. Other head to posterolateral fibula.<br>I: Tendon fuses with FHL tendon along TMT then splits into 3 parts to insert on unguis phalanges of digits II-IV. |
| RTL   | O: Lateral intercondylar region of the femur.<br>I: Tendon fuses with FDL tendon along TMT.                                                                 | O: One head to posterior tibial shaft. Other head to posterolateral fibula.<br>I: Tendon fuses with FHL tendon along TMT then splits into 3 parts to insert on unguis phalanges of digits II-IV. |
| CL    | O: Lateral intercondylar region of the femur.<br>I: Tendon fuses with FDL tendon along TMT.                                                                 | O: One head to posterior tibial shaft. Other head to posterolateral fibula.<br>I: Tendon fuses with FHL tendon along TMT then splits into 3 parts to insert on unguis phalanges of digits II-IV. |
| Notes | Tendon calcified along TBT. Tendon goes through bony canal in hypotarsus.                                                                                   | Tendon goes through deep bony canal in hypotarsus. Tendon calcified along TMT.                                                                                                                   |

Table S2 – continued from previous page

|     | PL                                                                                                                      | PO                                                                                                                 |
|-----|-------------------------------------------------------------------------------------------------------------------------|--------------------------------------------------------------------------------------------------------------------|
| GF  | O: Medial tibial condyle and most proximal, posterior tibial shaft.<br>I: Tendinous. Proximal, medial tibial cartilage. | O: Proximal, posterior tibial shaft and intercondylar region.<br>I: Posteromedial fibular head and proximal shaft. |
| MA  | O: Medial tibial condyle and most proximal, posterior tibial shaft.<br>I: Tendinous. Proximal, medial tibial cartilage. | O: Proximal, posterior tibial shaft and intercondylar region.<br>I: Posteromedial fibular head and proximal shaft. |
| CG  | O: Medial tibial condyle and most proximal, posterior tibial shaft.<br>I: Tendinous. Proximal, medial tibial cartilage. | O: Proximal, posterior tibial shaft and intercondylar region.<br>I: Posteromedial fibular head and proximal shaft. |
| MS  | O: Medial tibial condyle and most proximal, posterior tibial shaft.<br>I: Tendinous. Proximal, medial tibial cartilage. | O: Proximal, posterior tibial shaft and intercondylar region.<br>I: Posteromedial fibular head and proximal shaft. |
| DCC | O: Medial tibial condyle and most proximal, posterior tibial shaft.<br>I: Tendinous. Proximal, medial tibial cartilage. | O: Proximal, posterior tibial shaft and intercondylar region.<br>I: Posteromedial fibular head and proximal shaft. |
| WG  | O: Medial tibial condyle and most proximal, posterior tibial shaft.<br>I: Tendinous. Proximal, medial tibial cartilage. | O: Proximal, posterior tibial shaft and intercondylar region.<br>I: Posteromedial fibular head and proximal shaft. |
| RTL | O: Medial tibial condyle and most proximal, posterior tibial shaft.<br>I: Tendinous. Proximal, medial tibial cartilage. | O: Proximal, posterior tibial shaft and intercondylar region.<br>I: Posteromedial fibular head and proximal shaft. |
| CL  | O: Medial tibial condyle and most proximal, posterior tibial shaft.<br>I: Tendinous. Proximal, medial tibial cartilage. | O: Proximal, posterior tibial shaft and intercondylar region.<br>I: Posteromedial fibular head and proximal shaft. |
